# Supplementary material for: Remote spatiotemporal control of local states in thermal lattice
Source: Research Square preprint supplement (doi:10.21203/rs.3.rs-6992736/v1), 2025-07-03
Supplement: Supplementary file 1 [file 5622519e92259403331b9215.docx]

## Supplementary Material for

## **Remote spatiotemporal control of local states in thermal lattice**

Quan Liu1, Zhaochen Wang1, Sun-Kyung Kim2, Wonjoon Choi3, Xiaobing Luo1, Philippe Ben-Abdallah4, Run Hu1,2,*

1School of Energy and Power Engineering, Huazhong University of Science and Technology, Wuhan 430074, China

2Department of Applied Physics, Kyung Hee University, Yongin-Si, Gyeonggi-do 17104, Republic of Korea

3School of Mechanical Engineering, Korea University, Seoul 02841, Republic of Korea

4Laboratoire Charles Fabry, UMR 8501, Institut d’Optique, CNRS, Universit ́e Paris-Saclay, 2 Avenue Augustin Fresnel, 91127 Palaiseau Cedex, France

Email: [hurun@hust.edu.cn](mailto:hurun@hust.edu.cn)

**Ⅰ. DETAILED DERIVATION OF THE EFFECTIVE HAMILTONIAN FOR DIFFUSIVE AND CONVECTIVE ONE-DIMENSIONAL THERMAL LATTICE MODEL**

In this section, we will derive the effective Hamiltonian for diffusive and convective thermal lattice model. The heat transfer inside the thermal lattice can be discretized as one-dimensional heat conduction partial differential equation (PDE)

(S1)

where denotes the temperature at site , is designated as the heat flux between thermal site -1 and due to heat conduction, and *h* is described as the convective heat transfer coefficient of the selected site . and are the density and thermal capacity of each site in the thermal lattice with constant distance between two neighboring sites of .The continuity equation concludes that the heat accumulation (decay) rate at a given point equals the derivative of the heat flow toward (outward) that point via heat conduction and convective heat transfer between the point and the external environment. Fourier’s law states that the heat flux (defined as the rate of heat flow per site through a surface) is proportional to the negative gradient as The discretization of the heat flux for the structure in the lattice model leads to and By introducing the effective thermal diffusivity Eq. (S1) can be demonstrated as

(S2)

Furthermore, we designate excess temperature to eliminate the constant term *Tb* from the equation in order for Eq. (S2) to resemble the Schrödinger equation in form, thus Eq. (S2) is simplifed as

(S3)

where represents the thermal diffusion coefficient between neighboring sites and is demonstrated as the thermal convective coefficient between each site and the external bath. Such a linear equation relates the temperature on site to the normalized effective diffusion and convective coefficients of adjacent channels, temperatures on sites and and the external bath. If we consider a thermal structure made of *N* sites, implementing the above discretization procedure to all the sites in sequence leads to *N* linear equations as

The *N* linear equations can be written into a single matrix equation, i.e., the discretized thermal transfer equation, as

(S4)

where the time evolvement of all the excess temperatures ***θ***(*t*) is denoted as and T indicates transpose. Therefore, Eq. (S4) is analogous to the Schrödinger equation so that the governing effective Hamiltonian of the system consisting of *N* sites is depicted as

(S5)

which is the Eq. (4) of the main text.

**Ⅱ. REALIZATION OF THERMAL FLUCTUATIONAL CONTROL FOR DIFFERENT SITES IN THERMAL LATTICE MODEL**

In addition to thermal insulation and synchronization, we demonstrate thermal fluctuational control for different sites. The same as in the main text, we construct an aluminum circular ring with five disks (aluminum alloy 6063-T83 with thermal conductivity *λ*=201 W/(m-K), density *ρ*=2700 kg/m3 and heat capacity *Cp*=900 J/ (kg-K)). The lattice constant *a0*=12.5 cm and the ring channel width is *d*=1 cm. All these parameters are chosen according to the designed thermal diffusion coefficients.

As the first case of thermal fluctuational control, we perform required external power command onto a single site to achieve target control at another single site. The circular ring is surrounded with an external bath at temperature *Tb* = 300 K and the on-site temperatures of the five disks are initially held at temperatures *T1*(0)=*T2*(0)=*T3*(0)=*T4*(0)=*T5*(0)=300 K. First, we designate site #2 as the target fluctuational controlled domain, i.e., K and the external power command *P*1(*t*) derived from Eqs. (7) and (8) of the main text is injected onto site #1 to achieve fluctuational control so that the temperature evolution of the target site #2 converges to our prescribed thermal fluctuational control. Then, we designate site #3 as the target fluctuational controlled domain, i.e., K and the external power command *P*1(*t*) derived from Eqs. (7) and (8) of the main text is injected onto site #1 to achieve fluctuational control so that the temperature evolution of the target site #3 converges to our prescribed thermal fluctuational control. Finite element simulations are implemented to numerically resolve the heat transfer process, with heat conduction inside the circular ring, heat convection between the external bath, and the input spatiotemporal power as illustrated in Fig. S1. When the target site is #2, the temperature evolution at site #2 is gradually increasing and fluctuates after the external power command *P*1(*t*) is injected. As depicted in Fig. S1(a), after *t* =30 min, the temperature evolution at site #2 (red solid line) gradually coincides with the prescribed target temperature (purple dashed line). Likewise, when we designate site #3 as the target site, the temperature evolution at site #3 (blue solid line) gradually coincides with the target fluctuational temperature (purple dashed line) as presented in Fig. S1(b) after the external power command *P*1(*t*) is injected. It is worthy of mention that the temperature fluctuations at site #1 are larger in order for the temperature fluctuations to be transmitted to site #3.


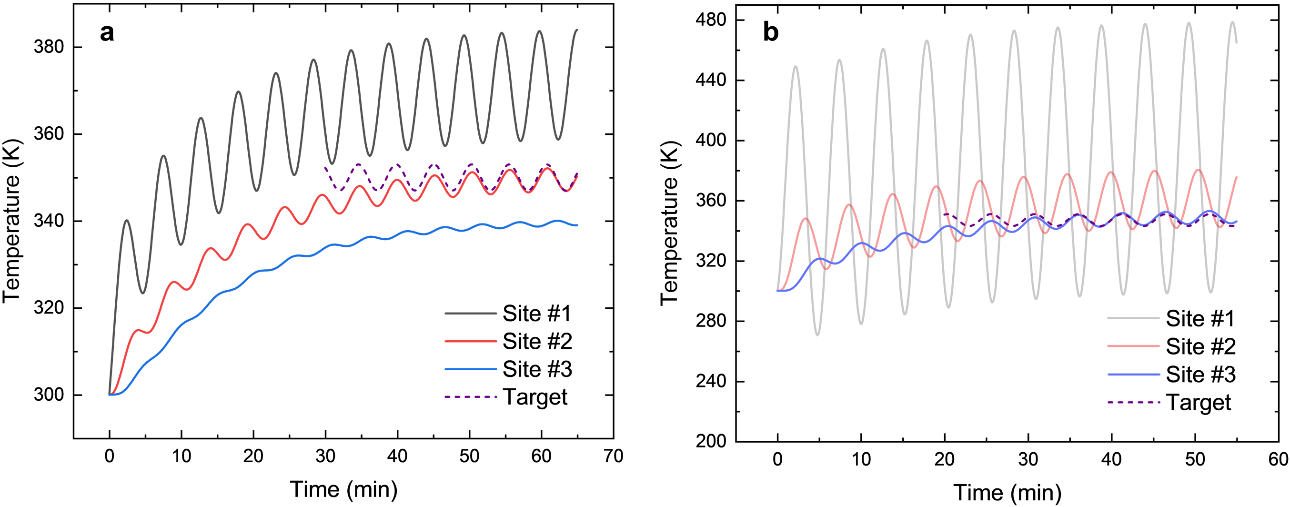


FIG. S1. Schematics for thermal fluctuational control at a single site. (a) Temperature evolution of thermal states when site #2 is the target site. (b) Temperature evolution of thermal states when site #3 is the target site.

As the second case of thermal fluctuational control, we perform required external power command onto two sites to achieve target wave synchronization at another two sites. The on-site temperatures of the five disks are initially held at temperatures *T1*(0)=*T2*(0)=*T4*(0)=*T5*(0)=300 K and *T3*(0)= 350 K. We designate site #3 and site #5 as the target wave synchronization sites, i.e., K. The external power command *P*1(*t*) and *P*2(*t*) are injected onto site #1 and site #2 respectively to achieve fluctuational control so that the temperature evolutions of the target site #3 and site #5 converge to our prescribed thermal target wave synchronization control as denoted in Fig. S2(a). Finite element simulations are implemented to numerically resolve the heat transfer process, with heat conduction inside the circular ring, heat convection between the external bath, and the input spatiotemporal power. As illustrated in Fig. S2(b), the temperature evolution at site #3 is gradually decreasing and then increasing while the temperature evolution at site #5 is always increasing after the external power command *P*1(*t*) and *P*2(*t*) are injected. After *t* =30 min, the temperature evolution at site #3 (black solid line) coincides with the temperature evolution at site #5 (red solid line) and then *T3*(*t*)and *T5*(*t*) gradually converge toward the target wave synchronization temperature (pink dashed line) and fluctuates. It is worthy of mention that there is a slight divergence in the temperature evolutions at site #1 and site #2 at the beginning stage, arising from the difference between *P*1(*t*) and *P*2(*t*).


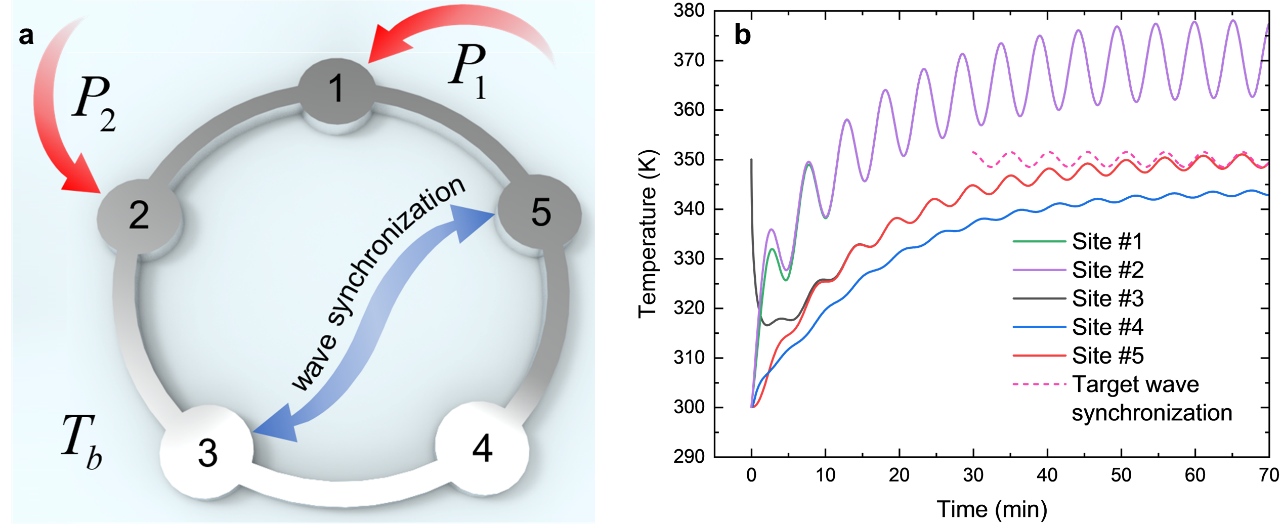


FIG. S2. Schematics for thermal wave synchronization control at multiple sites. (a) Schematic representation for setup of synchronization control. The external power command *P1* and *P2* are injected onto sites #1 and #2 in order to realize thermal synchronization at sites #3 and #5. (b) Time evolutions of temperatures at all thermal states and the prescribed target wave synchronization function.
